# Supplementary material for: Palmitoylethanolamide in Fibromyalgia: Results from Prospective and Retrospective Observational Studies
Source: Springer Nature journal article supplement (doi:10.1007/s40122-015-0038-6), 2015-09-02
Supplement: MOESM1 [file 9339888]

## *Why carry out this study?*

- Fibromyalgia syndrome (FM) is a rheumatic disease characterized by etiopathogenetic and clinical complexity that requires a multidisciplinary approach based on multi-modal therapeutic strategies.
- Palmitoylethanolamide (PEA), a member of the naturally-occurring family of fatty acid amides, is effective in the treatment of chronic pain caused by different etiopathogeneses suggesting activation of non-neuronal cells (mast cells and glia) as a common factor in the various pathological conditions.
- This study aims to investigate whether PEA would provide additional clinical benefit in controlling pain in patients with FM, in multimodal therapy.

## *What was learned from the study?*

- The results from this open-label, non-randomized, non-blinding clinical study suggests that for some patients requiring more than one FM medication, the addition of PEA may be a favorable treatment option.
- Further studies would need to be conducted to evaluate the benefits of combining these treatments in the general FM population.

This summary slide represents the opinions of the authors. No funding or sponsorship was received for this study or publication of this article. For a full list of acknowledgments and conflicts of interest for all authors of this article, please see the full text online. Copyright © The Author(s) 2015. Creative Commons Attribution Noncommercial License (CC BY-NC).
